# Supplementary material for: Multifunctional cytomegalovirus (CMV)-specific CD8+ T cells are not restricted by telomere-related senescence in young or old adults
Source: PubMed Central journal article supplement (PMC4368162; doi:10.1111/imm.12409), 2015-03-09

Supplementary table 1. Results from multiple linear regression fitting age and CMV response as covariates for CD8<sup>+</sup> T cell subset composition. Table shows the unstandardized coefficient, significance and 95% confidence interval from the output of SPSS software for each CD45RA/CD27 subset. Unit of age is equal to 1 year.

| <i>CD45RA<sup>+</sup>CD27<sup>+</sup></i> | unstandardized | <i>p</i> -value | 95.0% CI    |             |
|-------------------------------------------|----------------|-----------------|-------------|-------------|
|                                           | coefficient    |                 | lower limit | upper limit |
| age                                       | -0.59          | <.0001          | -0.7        | -0.49       |
| CMV response                              | -15.62         | <.0001          | -21.46      | -9.77       |

| <i>CD45RA<sup>-</sup>CD27<sup>+</sup></i> | unstandardized | <i>p</i> -value | 95.0% CI    |             |
|-------------------------------------------|----------------|-----------------|-------------|-------------|
|                                           | coefficient    |                 | lower limit | upper limit |
| age                                       | -0.03          | 0.52            | -0.12       | 0.06        |
| CMV response                              | -6.18          | <.01            | -10.86      | -1.49       |

| <i>CD45RA<sup>-</sup>CD27<sup>-</sup></i> | unstandardized | <i>p</i> -value | 95.0% CI    |             |
|-------------------------------------------|----------------|-----------------|-------------|-------------|
|                                           | coefficient    |                 | lower limit | upper limit |
| age                                       | 0.125          | <0.05           | 0.005       | 0.24        |
| CMV response                              | 9.05           | < 0.01          | 2.58        | 15.53       |

| <i>CD45RA<sup>+</sup>CD27<sup>-</sup></i> | unstandardized | <i>p</i> -value | 95.0% CI    |             |
|-------------------------------------------|----------------|-----------------|-------------|-------------|
|                                           | coefficient    |                 | lower limit | upper limit |
| age                                       | 0.385          | <.0001          | 0.27        | 0.5         |
| CMV response                              | 14.77          | < .0001         | 8.43        | 21.11       |

Supplementary table 2. Statistical comparisons of percentage of CD8<sup>+</sup> T cell cytokine producing populations following overnight stimulation of PBMCs with anti-CD3 and IL-2. Results from Paired T-test.

|              | IFN    | TNF    | IL2/IFN | IL2/TNF | IFN/TNF | IL2/IFN/TNF |
|--------------|--------|--------|---------|---------|---------|-------------|
| <b>Young</b> |        |        |         |         |         |             |
| IL2          | 0.0089 | 0.0013 | 0.0365  | ns      | 0.0223  | ns          |
| IFN          | -      | 0.0124 | 0.0081  | 0.0085  | 0.0491  | 0.0124      |
| TNF          | -      | -      | 0.0012  | 0.0012  | ns      | 0.0015      |
| IL2/IFN      | -      | -      | -       | ns      | 0.0220  | 0.0432      |
| IL2/TNF      | -      | -      | -       | -       | 0.0219  | ns          |
| IFN/TNF      | -      | -      | -       | -       | -       | 0.0229      |
| <b>Old</b>   |        |        |         |         |         |             |
| IL2          | 0.0343 | 0.0001 | ns      | 0.0250  | 0.0089  | ns          |
| IFN          | -      | ns     | 0.0252  | 0.0462  | 0.0157  | ns          |
| TNF          | -      | -      | <0.0001 | 0.0002  | 0.0282  | 0.0002      |
| IL2/IFN      | -      | -      | -       | 0.0313  | 0.0081  | ns          |
| IL2/TNF      | -      | -      | -       | -       | 0.0096  | ns          |
| IFN/TNF      | -      | -      | -       | -       | -       | 0.0079      |

Supplementary table 3. Statistical comparisons of telomere length of CD8<sup>+</sup> T cell cytokine producing populations following overnight stimulation of PBMCs with anti-CD3 and IL-2. Results from Paired T-test.

|              | IFN   | TNF   | IL2/IFN | IL2/TNF | IFN/TNF | IL2/IFN/TNF | Negative |
|--------------|-------|-------|---------|---------|---------|-------------|----------|
| <b>Young</b> |       |       |         |         |         |             |          |
| IL2          | 0.012 | 0.004 | 0.011   | ns      | 0.006   | 0.018       | ns       |
| IFN          | -     | ns    | ns      | ns      | 0.016   | ns          | .023     |
| TNF          | -     | -     | ns      | 0.026   | ns      | 0.001       | .006     |
| IL2/IFN      | -     | -     | -       | ns      | ns      | ns          | ns       |
| IL2/TNF      | -     | -     | -       | -       | 0.028   | ns          | ns       |
| IFN/TNF      | -     | -     | -       | -       | -       | 0.003       | .001     |
| IL2/IFN/TNF  | -     | -     | -       | -       | -       | -           | .034     |
| <b>Old</b>   |       |       |         |         |         |             |          |
| IL2          | ns    | ns    | 0.028   | 0.013   | ns      | ns          | ns       |
| IFN          | -     | ns    | ns      | ns      | ns      | ns          | ns       |
| TNF          | -     | -     | ns      | ns      | ns      | ns          | ns       |
| IL2/IFN      | -     | -     | -       | ns      | ns      | ns          | ns       |
| IL2/TNF      | -     | -     | -       | -       | ns      | 0.048       | ns       |
| IFN/TNF      | -     | -     | -       | -       | -       | ns          | ns       |
| IL2/IFN/TNF  | -     | -     | -       | -       | -       | -           | ns       |

Supplementary table 4. Statistical comparisons of percentage of CD8<sup>+</sup> T cell cytokine producing populations following overnight stimulation of PBMCs with NLV peptide. Results from Wilcoxon Signed Rank Test.

|              | IFN  | TNF  | IL2/IFN | IL2/TNF | IFN/TNF | IL2/IFN/TNF |
|--------------|------|------|---------|---------|---------|-------------|
| <b>Young</b> |      |      |         |         |         |             |
| IL2          | .043 | .176 | .018    | .028    | .128    | .686        |
| IFN          | -    | .612 | .018    | .018    | .866    | .018        |
| TNF          | -    | -    | .018    | .018    | .612    | .018        |
| IL2/IFN      | -    | -    | -       | .237    | .028    | .043        |
| IL2/TNF      | -    | -    | -       | -       | .018    | .018        |
| IFN/TNF      | -    | -    | -       | -       | -       | .018        |
| <b>Old</b>   |      |      |         |         |         |             |
| IL2          | .138 | .080 | .225    | .893    | .043    | .176        |
| IFN          | -    | .345 | .043    | .043    | .345    | .043        |
| TNF          | -    | -    | .043    | .043    | .225    | .043        |
| IL2/IFN      | -    | -    | -       | .893    | .043    | .866        |
| IL2/TNF      | -    | -    | -       | -       | .043    | .500        |
| IFN/TNF      | -    | -    | -       | -       | -       | .043        |

Supplementary table 5. Statistical comparisons of telomere length of CD8<sup>+</sup> T cell cytokine producing populations following overnight stimulation of PBMCs with NLV peptide. Results from Wilcoxon Signed Rank Test.

|              | IFN | TNF  | IL2/IFN | IL2/TNF | IFN/TNF | IL2/IFN/TNF | Negative |
|--------------|-----|------|---------|---------|---------|-------------|----------|
| <b>Young</b> |     |      |         |         |         |             |          |
| IL2          | ns  | .028 | .043    | ns      | .028    | ns          | ns       |
| IFN          | -   | .028 | ns      | ns      | .028    | ns          | ns       |
| TNF          | -   | -    | ns      | ns      | ns      | ns          | .028     |
| IL2/IFN      | -   | -    | -       | ns      | ns      | ns          | ns       |
| IL2/TNF      | -   | -    | -       | -       | ns      | ns          | ns       |
| IFN/TNF      | -   | -    | -       | -       | -       | ns          | .028     |
| IL2/IFN/TNF  | -   | -    | -       | -       | -       | -           | ns       |
| <b>Old</b>   |     |      |         |         |         |             |          |
| IL2          | ns  | ns   | ns      | ns      | ns      | ns          | ns       |
| IFN          | -   | ns   | ns      | ns      | .043    | ns          | .043     |
| TNF          | -   | -    | ns      | ns      | ns      | ns          | .043     |
| IL2/IFN      | -   | -    | -       | ns      | ns      | ns          | ns       |
| IL2/TNF      | -   | -    | -       | -       | ns      | ns          | -        |
| IFN/TNF      | -   | -    | -       | -       | -       | ns          | .043     |
| IL2/IFN/TNF  | -   | -    | -       | -       | -       | -           | ns       |

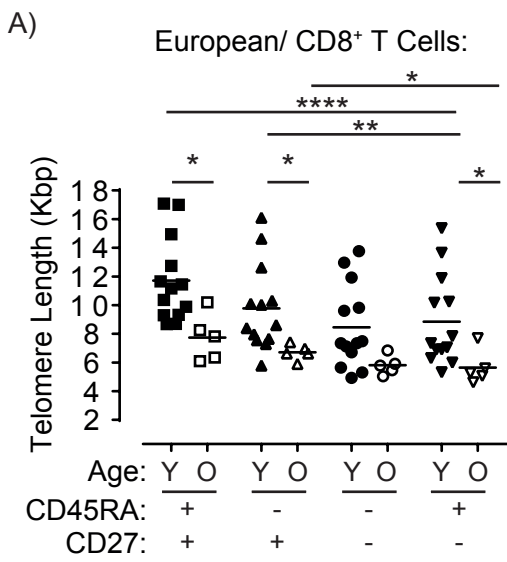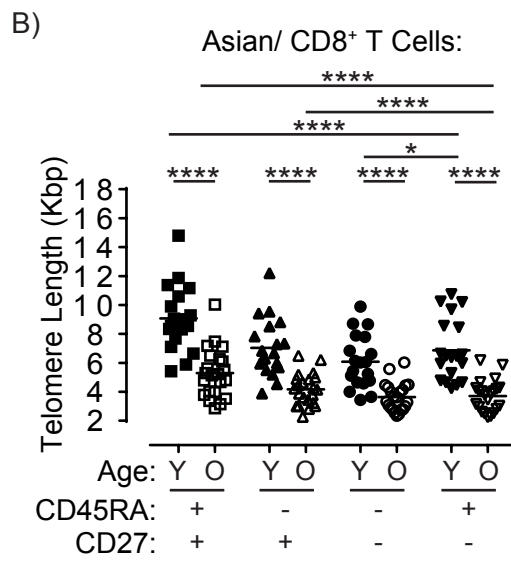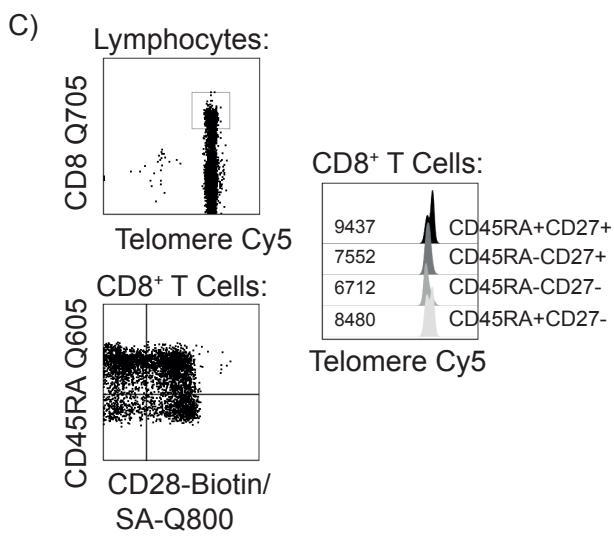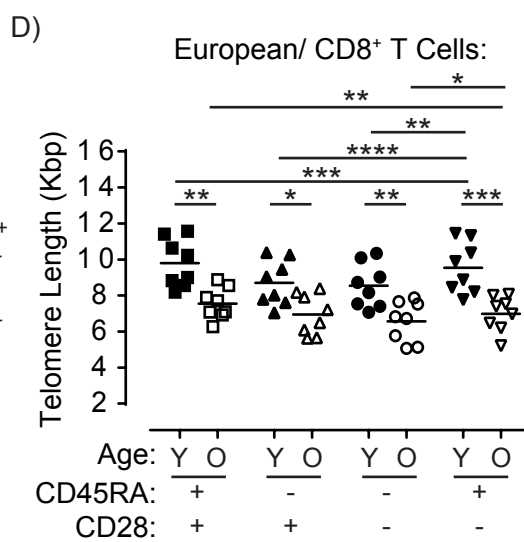

Supplement: imm0144-0549-sd1.pdf [file imm0144-0549-sd1.pdf]
